# Supplementary material
Source: PubMed Central journal article supplement (PMC8633979)
Supplement: NIHMS1638347-supplement-1.pdf [file NIHMS1638347-supplement-1.pdf]

(A)

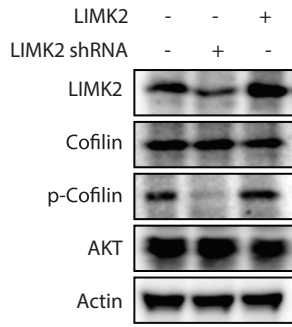

22Rv1

(B)

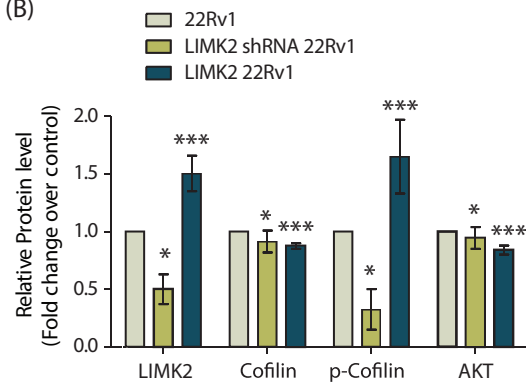

(C)

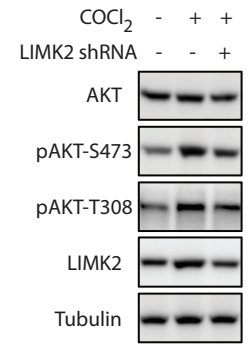

(D)

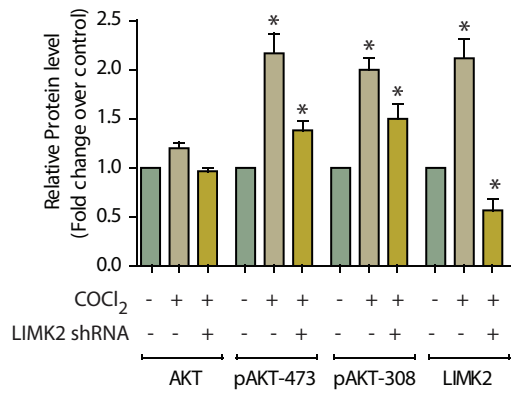

22Rv1

Supplementary Figure 1

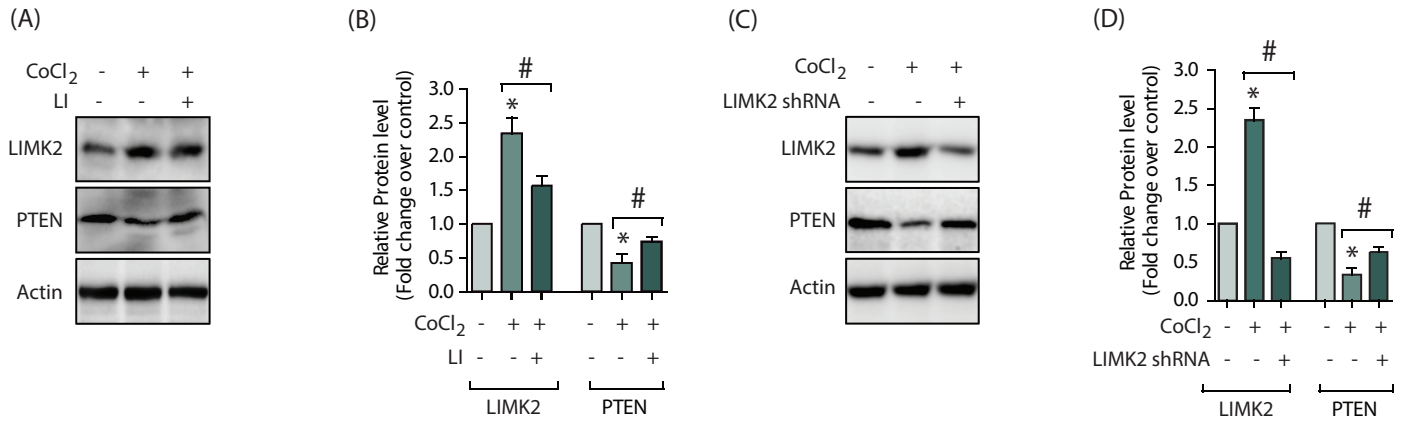

Supplementary Figure 2

**Supplementary Table 1**

|    | <b>Antibody</b> | <b>Catalog Number</b> | <b>Company</b>      | <b>RRID/Lot</b>     |
|----|-----------------|-----------------------|---------------------|---------------------|
| 1  | LIMK2           | SC-365414             | Santa Cruz Biotech  | RRID:AB_10847817    |
| 2  | Actin           | SC-8432               | Santa Cruz Biotech  | RRID:AB_626630      |
| 3  | Tubulin         | SC-8035               | Santa Cruz Biotech  | RRID:AB_628408      |
| 4  | PTEN            | SC-7974               | Santa Cruz Biotech  | RRID:AB_628187      |
| 5  | SNAIL           | PB9439                | Boster              | Lot#0931512DA859969 |
| 6  | SLUG            | PB9399                | Boster              | Lot#0931512DA859969 |
| 7  | N-Cadherin      | PA1328                | One World Lab       | AB_10891323         |
| 8  | CD44            | PA1021                | One World Lab       | AB_10890445         |
| 9  | Vimentin        | SC-7558               | Santa Cruz Biotech  | RRID:AB_794002      |
| 10 | E-Cadherin      | bs-10009R             | Bioss Inc           | Lot#9L18W1          |
| 11 | MMP-2           | bs-4599R              | Bioss Inc           | RRID:AB_11083963    |
| 12 | HA              | 12CA5                 | Thermo Fisher       | RRID:AB_1958069     |
| 13 | 6x-His          | AB-1711               | Columbia Bioscience | Lot# PUR01016008    |
| 14 | AKT             | 9272                  | Cell Signaling      | RRID:AB_329828      |
| 15 | pAkt-T308       | 9275S                 | Cell Signaling      | RRID:AB_329828      |
| 16 | pAkt-S473       | SC-293125             | Santa Cruz Biotech  |                     |
| 17 | Lamin-A         | SC-20680              | Santa Cruz Biotech  | RRID:AB_648148      |
| 18 | Phospho-Ser     | SC-81514              | Santa Cruz Biotech  | RRID:AB_112862      |
| 19 | Phospho-Cofilin | SC-271921             | Santa Cruz Biotech  | RRID:AB_10610754    |
| 20 | Histone H4      | SC-10810              | Santa Cruz Biotech  | RRID:AB_2118775     |

## Supplementary Table 2

### Real-time qPCR primers:

| Name             | Primer Sequences                     |
|------------------|--------------------------------------|
| LIMK2 F          | 5'- GTTGTAGGGAACTGAGGGGAG A-3'       |
| LIMK2 R          | 5'- GGCATTCTGAACACCGGAAG -3'         |
| PTEN F           | 5'- CAAGATGATGTTTGAAACTATTCCAATG -3' |
| PTEN R           | 5'- CCTTTAGCTGGCAGACCACAA -3'        |
| $\beta$ -Actin F | 5'- CATGTACGTTGCTATCCAGGC -3'        |
| $\beta$ -Actin R | 5'- CTCCTTAATGTCACGCACGAT -3'        |
